# Supplementary material
Source: PubMed Central journal article supplement (PMC2897571)
Supplement: supp_30_13_3357__1.pdf [file supp_30_13_3357__1.pdf]

## Appendix

**Table A1. Genes included in the training set.**

| <b>Known Imprinted Genes</b> |                  | <b>Non-Imprinted Genes</b> |                      |               |
|------------------------------|------------------|----------------------------|----------------------|---------------|
| <i>Apoc2</i>                 | <i>Osbp15</i>    | <i>Acvr11</i>              | <i fn1<="" i=""></i> | <i>Nog</i>    |
| <i>Asb4</i>                  | <i>Peg10</i>     | <i>Ada</i>                 | <i>Foxd1</i>         | <i>Nte</i>    |
| <i>Calcr</i>                 | <i>Peg12</i>     | <i>Adcy3</i>               | <i>Foxg1</i>         | <i>Ntrk1</i>  |
| <i>Cd81</i>                  | <i>Peg3</i>      | <i>Adcy7</i>               | <i>Fst</i>           | <i>Ntrk2</i>  |
| <i>Cdkn1c</i>                | <i>Phlda2</i>    | <i>Akp2</i>                | <i>Gba</i>           | <i>Ntrk3</i>  |
| <i>Commd1</i>                | <i>Plagl1</i>    | <i>Apaf1</i>               | <i>Gdf1</i>          | <i>Otx1</i>   |
| <i>Copg2</i>                 | <i>Pon2</i>      | <i>Arnt</i>                | <i>Gja1</i>          | <i>Ppard</i>  |
| <i>Dcn</i>                   | <i>Pon3</i>      | <i>Ascl1</i>               | <i>Hbb</i>           | <i>Psen1</i>  |
| <i>Dlk1</i>                  | <i>Ppp1r9a</i>   | <i>Ass1</i>                | <i>Hdh</i>           | <i>Rela</i>   |
| <i>Gatm</i>                  | <i>Rasgrf1</i>   | <i>Atoh1</i>               | <i>Hgs</i>           | <i>Runx1</i>  |
| <i>Gnas</i>                  | <i>Rb1</i>       | <i>Bcl2</i>                | <i>Inhba</i>         | <i>Shh</i>    |
| <i>Grb10</i>                 | <i>Sgce</i>      | <i>Bdnf</i>                | <i>Itga5</i>         | <i>Slc4a1</i> |
| <i>Gtl2</i>                  | <i>Slc22a18</i>  | <i>Cdh1</i>                | <i>Itgav</i>         | <i>Smo</i>    |
| <i>H19</i>                   | <i>Slc22a2</i>   | <i>Cdh2</i>                | <i>Itgb1</i>         | <i>Snap25</i> |
| <i>Htr2a</i>                 | <i>Slc22a3</i>   | <i>Cdk5</i>                | <i>Jun</i>           | <i>Sp4</i>    |
| <i>Igf2</i>                  | <i>Slc38a4</i>   | <i>Chrna3</i>              | <i>Jup</i>           | <i>Tal1</i>   |
| <i>Igf2r</i>                 | <i>Snrpn</i>     | <i>Col3a1</i>              | <i>Kcnj2</i>         | <i>Tgfb1</i>  |
| <i>Impact</i>                | <i>Snurf</i>     | <i>Csk</i>                 | <i>Klf1</i>          | <i>Tgfbr1</i> |
| <i>Ins2</i>                  | <i>Tnfrsf23</i>  | <i>Cxcr4</i>               | <i>Kras</i>          | <i>Tsc2</i>   |
| <i>Kcnq1</i>                 | <i>Tspan32</i>   | <i>Cycs</i>                | <i>Lifr</i>          | <i>Unc5c</i>  |
| <i>Magel2</i>                | <i>Tssc4</i>     | <i>Dgat2</i>               | <i>Mad2l1</i>        | <i>Vcam1</i>  |
| <i>Mash2</i>                 | <i>U2af1-rs1</i> | <i>Dnmt1</i>               | <i>Maf</i>           | <i>Vhlh</i>   |
| <i>Mcts2</i>                 | <i>Ube3a</i>     | <i>Edn3</i>                | <i>Map2k4</i>        | <i>Wnt3a</i>  |
| <i>Mest</i>                  | <i>Zim1</i>      | <i>Ednrb</i>               | <i>Mdm2</i>          | <i>Wnt5a</i>  |
| <i>Mkrn3</i>                 |                  | <i>Efemp2</i>              | <i>Mgat1</i>         | <i>Wnt7b</i>  |
| <i>Nap1l4</i>                |                  | <i>En1</i>                 | <i>Myb</i>           | <i>Wt1</i>    |
| <i>Nap1l5</i>                |                  | <i>Epas1</i>               | <i>Myf5</i>          |               |
| <i>Ndn</i>                   |                  | <i>Evi1</i>                | <i>Myf6</i>          |               |
| <i>Nnat</i>                  |                  | <i>F5</i>                  | <i>Nf1</i>           |               |

A total of 137 genes, including known imprinted and non-imprinted genes, were included in the training data set. Fifty-three genes fall within the known imprinted category, while 84 genes fall within the non-imprinted category. We compiled the 53 known imprinted genes from the Imprinted Gene Catalogue (<http://igc.otago.ac.nz/Search.html>). The non-imprinted genes were assumed to be non-imprinted based on the lethality of homozygous mutations and the viability of heterozygous mutations in mice as described in the Jackson Laboratories MGI database (<http://www.informatics.jax.org/>).

**Table A2. Correlation coefficient p-values for features enriched in imprinted genes by gene region used to generate Figure 1.**

| Feature           | 100up    | 10up     | 1up      | 5'UTR    | In Gene  | Exons    | Introns  | 3'UTR    | 1dn      | 10dn     | 100dn    | Pos | Neg |
|-------------------|----------|----------|----------|----------|----------|----------|----------|----------|----------|----------|----------|-----|-----|
| %CG               | 0.912378 | 0.590616 | 0.043953 | 0.345161 | 0.287104 | 0.260332 | 0.813265 | 0.434307 | 0.294456 | 0.007114 | 0.200820 | 0   | 0   |
| G-quartets        | 0.703111 | 0.133142 | 0.680119 | 0.001767 | 0.009755 | 0.968707 | 0.004456 | 0.768283 | 0.000098 | 0.757766 | 0.445824 | 1   | 0   |
| miRNA             | 0.000000 | 0.050574 | 0.006366 | 0.859144 | 0.014490 | 0.003085 | 0.040250 | 0.818769 | 0.820586 | 0.003972 | 0.000000 | 2   | 0   |
| CpG island        | 0.044549 | 0.773639 | 0.811157 | 0.042787 | 0.004542 | 0.704237 | 0.000046 | 0.000000 | 0.368262 | 0.044848 | 0.029007 | 2   | 0   |
| Verified CTCF     | 0.000000 | 0.000000 | 0.859144 | 0.952835 | 0.000000 | 0.875636 | 0.000000 | 0.933337 | 0.933337 | 0.812930 | 0.000000 | 5   | 0   |
| Predicted CTCF    | 0.013586 | 0.000000 | 0.026743 | 0.625201 | 0.683401 | 0.587129 | 0.681047 | 0.591622 | 0.064826 | 0.233170 | 0.077739 | 1   | 0   |
| EF H3K4me3        | 0.548611 | 0.003186 | 0.548387 | 0.001679 | 0.058327 | 0.000727 | 0.034300 | 0.165958 | 0.220383 | 0.440995 | 0.868248 | 0   | 0   |
| EF H3K9me3        | 0.006238 | 0.000002 | 0.000100 | 0.005080 | 0.372446 | 0.002976 | 0.171234 | 0.005558 | 0.139872 | 0.063811 | 0.053517 | 2   | 0   |
| EF H3K27me3       | 0.000072 | 0.000000 | 0.007393 | 0.000062 | 0.003116 | 0.019873 | 0.002924 | 0.004269 | 0.101935 | 0.006277 | 0.003064 | 3   | 0   |
| EF H3K36me3       | 0.001142 | 0.811425 | 0.714943 | 0.763260 | 0.621611 | 0.176142 | 0.766424 | 0.329263 | 0.006740 | 0.000020 | 0.018163 | 0   | 1   |
| ES H4K20me3       | 0.000000 | 0.000000 | 0.000000 | 0.000000 | 0.000878 | 0.000001 | 0.000633 | 0.000000 | 0.000024 | 0.000000 | 0.000005 | 9   | 0   |
| ES H3K4me3        | 0.336046 | 0.020766 | 0.254961 | 0.001146 | 0.005397 | 0.097354 | 0.005807 | 0.987056 | 0.227799 | 0.046610 | 0.146762 | 0   | 0   |
| ES H3K9me3        | 0.000000 | 0.000000 | 0.000000 | 0.000000 | 0.000000 | 0.001114 | 0.000000 | 0.000000 | 0.000061 | 0.000000 | 0.000000 | 9   | 0   |
| ES H3K27me3       | 0.000000 | 0.000000 | 0.000000 | 0.000000 | 0.000000 | 0.000006 | 0.000000 | 0.000096 | 0.000084 | 0.000070 | 0.000000 | 11  | 0   |
| ES H3K36me3       | 0.005576 | 0.868870 | 0.595748 | 0.490950 | 0.424074 | 0.178215 | 0.633940 | 0.510597 | 0.004685 | 0.000147 | 0.102057 | 0   | 1   |
| ES H3K4me3 (HMM)  | 0.171486 | 0.004015 | 0.000013 | 0.039469 | 0.000005 | 0.005329 | 0.000423 | 0.138784 | 0.388726 | 0.353818 | 0.251803 | 2   | 0   |
| ES H3K9me3 (HMM)  | 0.000000 | 0.000000 | 0.000000 | 0.000000 | 0.000000 | 0.577023 | 0.000000 | 0.000000 | 0.000000 | 0.000794 | 0.000007 | 9   | 0   |
| ES H3K27me3 (HMM) | 0.000000 | 0.000000 | 0.002089 | 0.002150 | 0.000000 | 0.000000 | 0.000000 | 0.529679 | 0.366802 | 0.046649 | 0.017285 | 5   | 0   |
| ES H3K36me3 (HMM) | 0.007396 | 0.107181 | 0.039114 | 0.401464 | 0.073591 | 0.388030 | 0.041782 | 0.426347 | 0.100102 | 0.007915 | 0.013052 | 0   | 0   |
| ES H4K20me3 (HMM) | 0.000000 | 0.000000 | 0.000000 | 0.000000 | 0.000000 | 0.000000 | 0.000000 | 0.000000 | 0.000000 | 0.000000 | 0.000006 | 11  | 0   |
| ES H3K4me3 (WIN)  | 0.006011 | 0.341020 | 0.296925 | 0.161729 | 0.015081 | 0.062799 | 0.014067 | 0.565580 | 0.989288 | 0.216237 | 0.036394 | 0   | 0   |
| ES H3K9me3 (WIN)  | 0.000047 | 0.000000 | 0.000000 | 0.000000 | 0.000000 | 0.000176 | 0.000000 | 0.006699 | 0.011259 | 0.000000 | 0.000197 | 7   | 0   |
| EF H3K27me3 (WIN) | 0.000000 | 0.000000 | 0.012421 | 0.002909 | 0.000000 | 0.504756 | 0.000000 | 0.000000 | 0.000000 | 0.000000 | 0.000001 | 8   | 0   |
| EF H3K4me3 (WIN)  | 0.126426 | 0.341020 | 0.000000 | 0.042801 | 0.020089 | 0.866204 | 0.078138 | 0.114392 | 0.436092 | 0.443941 | 0.018221 | 1   | 0   |
| EF H3K9me3 (WIN)  | 0.072684 | 0.000002 | 0.701288 | 0.824815 | 0.326421 | 0.220057 | 0.597690 | 0.762867 | 0.725864 | 0.254941 | 0.552456 | 1   | 0   |
| EF H3K27me3 (WIN) | 0.002882 | 0.000013 | 0.116783 | 0.003378 | 0.008004 | 0.297751 | 0.020161 | 0.983317 | 0.002083 | 0.018956 | 0.353656 | 1   | 0   |
| NP H3K4me3 (WIN)  | 0.001221 | 0.061094 | 0.096342 | 0.045705 | 0.984355 | 0.834144 | 0.772224 | 0.881972 | 0.789637 | 0.552109 | 0.004411 | 1   | 0   |
| NP H3K9me3 (WIN)  | 0.522721 | 0.646058 | 0.831093 | 0.884796 | 0.386553 | 0.771782 | 0.409352 | 0.771914 | 0.767341 | 0.690569 | 0.259141 | 0   | 0   |
| NP H3K27me3 (WIN) | 0.000000 | 0.000000 | 0.012421 | 0.000000 | 0.000007 | 0.000325 | 0.006452 | 0.004969 | 0.000000 | 0.000000 | 0.000000 | 7   | 0   |

For each gene region examined, the correlation coefficient p-value (indicating the significance of correlation with imprinting status) for each of the features of interest included in our analysis is shown. Correlation coefficients were calculated using the `cor()` function in [R]. P-values for the correlation coefficients were calculated using a two-tailed t-test and were considered significant if less than 0.000157 (0.05 p-value/319 comparisons) after Bonferroni correcting for multiple comparisons. Features with significant p-values are highlighted in either green, to signify a correlation in the positive direction, or red, to signify a correlation in the negative direction. The columns labelled “Pos” and “Neg” tally the number of regions in which each feature correlates with imprinted genes in a positive and a negative direction, respectively. ES stands for embryonic stem cells, EF stands for embryonic fibroblast cells, and NP stands for neural progenitor cells. HMM stands for

enrichment as determined using a Hidden Markov Model, while WIN stands for enrichment as determined using a sliding window model (30).

**Table A3. Correlation coefficients for features enriched in imprinted genes by gene region used to generate Figure 1.**

| Feature           | 100up   | 10up    | 1up     | 5'UTR   | In Gene | Exons   | Introns | 3'UTR   | 1dn     | 10dn    | 100dn   |
|-------------------|---------|---------|---------|---------|---------|---------|---------|---------|---------|---------|---------|
| %CG               | -0.0006 | 0.0031  | 0.0117  | 0.0055  | 0.0062  | 0.0065  | -0.0014 | -0.0045 | -0.0061 | -0.0157 | -0.0074 |
| G-quartets        | 0.0022  | 0.0087  | -0.0024 | 0.0182  | 0.0150  | -0.0002 | 0.0165  | -0.0017 | 0.0227  | 0.0018  | 0.0044  |
| miRNA             | 0.0472  | 0.0114  | 0.0159  | -0.0010 | 0.0142  | 0.0172  | 0.0119  | -0.0013 | -0.0013 | 0.0168  | 0.0311  |
| CpG island        | -0.0117 | 0.0017  | 0.0014  | 0.0118  | 0.0165  | 0.0022  | 0.0237  | 0.0380  | -0.0052 | -0.0117 | -0.0127 |
| Verified CTCF     | 0.0795  | 0.0928  | -0.0010 | -0.0003 | 0.0342  | -0.0009 | 0.0339  | -0.0005 | -0.0005 | -0.0014 | 0.0778  |
| Predicted CTCF    | 0.0144  | 0.0314  | 0.0129  | -0.0028 | -0.0024 | -0.0032 | -0.0024 | -0.0031 | 0.0107  | 0.0069  | 0.0103  |
| EF H3K4me3        | -0.0035 | 0.0172  | 0.0035  | 0.0183  | 0.0110  | 0.0197  | 0.0123  | 0.0081  | 0.0071  | -0.0045 | -0.0010 |
| EF H3K9me3        | 0.0159  | 0.0276  | 0.0226  | 0.0163  | 0.0052  | 0.0173  | 0.0080  | 0.0161  | -0.0086 | 0.0108  | 0.0112  |
| EF H3K27me3       | 0.0231  | 0.0294  | 0.0156  | 0.0233  | 0.0172  | 0.0135  | 0.0173  | 0.0166  | 0.0095  | 0.0159  | 0.0172  |
| EF H3K36me3       | -0.0189 | -0.0014 | 0.0021  | -0.0018 | -0.0029 | -0.0079 | -0.0017 | -0.0057 | -0.0158 | -0.0248 | -0.0137 |
| ES H4K20me3       | 0.0457  | 0.1074  | 0.0949  | 0.0325  | 0.0194  | 0.0282  | 0.0199  | 0.0327  | 0.0246  | 0.0351  | 0.0266  |
| ES H3K4me3        | -0.0056 | 0.0135  | 0.0066  | 0.0189  | 0.0162  | 0.0096  | 0.0160  | 0.0001  | -0.0070 | -0.0116 | -0.0084 |
| ES H3K9me3        | 0.0452  | 0.0902  | 0.0929  | 0.0443  | 0.0188  | 0.0292  | 0.0190  | 0.0337  | 0.0233  | 0.0305  | 0.0298  |
| ES H3K27me3       | 0.0448  | 0.0405  | 0.0466  | 0.0344  | 0.0338  | 0.0263  | 0.0326  | 0.0227  | 0.0229  | 0.0231  | 0.0395  |
| ES H3K36me3       | -0.0161 | -0.0010 | -0.0031 | -0.0040 | 0.0047  | -0.0078 | 0.0028  | 0.0038  | -0.0165 | -0.0221 | -0.0095 |
| ES H3K4me3 (HMM)  | -0.0080 | 0.0167  | 0.0254  | 0.0120  | 0.0266  | 0.0162  | 0.0205  | -0.0086 | -0.0050 | -0.0054 | -0.0067 |
| ES H3K9me3 (HMM)  | 0.0373  | 0.0939  | 0.1475  | 0.0395  | 0.0864  | -0.0032 | 0.0766  | 0.0715  | 0.0424  | 0.0195  | 0.0261  |
| ES H3K27me3 (HMM) | 0.0408  | 0.0385  | 0.0179  | 0.0179  | 0.0474  | 0.0323  | 0.0367  | 0.0037  | -0.0053 | 0.0116  | 0.0138  |
| ES H3K36me3 (HMM) | -0.0156 | -0.0094 | 0.0120  | -0.0049 | -0.0104 | -0.0050 | -0.0118 | -0.0046 | -0.0096 | -0.0155 | -0.0144 |
| ES H4K20me3 (HMM) | 0.0476  | 0.0864  | 0.1825  | 0.0584  | 0.0869  | 0.0370  | 0.0747  | 0.0342  | 0.0459  | 0.0483  | 0.0263  |
| ES H3K4me3 (WIN)  | -0.0160 | 0.0055  | 0.0061  | 0.0081  | 0.0141  | -0.0108 | 0.0143  | -0.0033 | 0.0001  | -0.0072 | -0.0122 |
| ES H3K9me3 (WIN)  | 0.0237  | 0.0649  | 0.1111  | 0.0301  | 0.0607  | 0.0218  | 0.0465  | 0.0158  | 0.0147  | 0.0318  | 0.0217  |
| ES H3K27me3 (WIN) | 0.0498  | 0.0364  | 0.0145  | 0.0173  | 0.0733  | 0.0039  | 0.0646  | 0.0301  | 0.0331  | 0.0294  | 0.0283  |
| EF H3K4me3 (WIN)  | -0.0089 | 0.0055  | 0.0434  | 0.0118  | 0.0135  | 0.0010  | 0.0102  | 0.0092  | 0.0045  | -0.0045 | -0.0137 |
| EF H3K9me3 (WIN)  | 0.0104  | 0.0276  | -0.0022 | -0.0013 | 0.0057  | 0.0071  | 0.0031  | -0.0018 | -0.0020 | 0.0066  | 0.0035  |
| EF H3K27me3 (WIN) | 0.0173  | 0.0253  | 0.0091  | 0.0171  | 0.0154  | 0.0061  | 0.0135  | -0.0001 | 0.0179  | 0.0137  | 0.0054  |
| NP H3K4me3 (WIN)  | -0.0188 | -0.0109 | 0.0097  | 0.0116  | -0.0001 | 0.0012  | -0.0017 | 0.0009  | 0.0016  | -0.0035 | -0.0166 |
| NP H3K9me3 (WIN)  | -0.0037 | -0.0027 | -0.0012 | -0.0008 | -0.0050 | -0.0017 | -0.0048 | -0.0017 | -0.0017 | -0.0023 | -0.0066 |
| NP H3K27me3 (WIN) | 0.0440  | 0.0452  | 0.0145  | 0.0393  | 0.0261  | 0.0209  | 0.0158  | 0.0163  | 0.0481  | 0.0495  | 0.0374  |

For each gene region examined, the correlation coefficient (indicating the degree of correlation with imprinting status) for each of the features of interest included in our analysis is shown. Features that show positive correlation with imprinting are highlighted in green, while features that show negative correlation with imprinting are highlighted in red. ES stands for embryonic stem cells, EF stands for embryonic fibroblast cells, and NP stands for neural progenitor cells. HMM stands for enrichment as determined using a Hidden Markov Model, while WIN stands for enrichment as determined using a sliding window model (30).

**Table A4. Genes included in the test data set.**

| <b>Known Imprinted</b>  | <b>Non-Imprinted</b> |                |
|-------------------------|----------------------|----------------|
| <b><i>Air</i></b>       | <i>Alx4</i>          | <i>Ntf3</i>    |
| <i>Atp10a</i>           | <i>Bub1</i>          | <i>Phoxa2</i>  |
| <b><i>Ddc</i></b>       | <i>Casr</i>          | <i>Rxrn</i>    |
| <i>Dhcr7</i>            | <i>Cpt1a</i>         | <i>Sall2</i>   |
| <b><i>Peg10</i></b>     | <i>Eln</i>           | <i>Ski1</i>    |
| <b><i>Inpp5f_v2</i></b> | <i>Gja5</i>          | <i>Sod2</i>    |
| <b><i>Sfmbt2</i></b>    | <i>Hoxc13</i>        | <i>Tbx4</i>    |
| <i>Tfpi2</i>            | <i>Inpp11</i>        | <i>Trp35b2</i> |
| <b><i>Th</i></b>        | <i>Kcna2</i>         | <i>Vcl</i>     |
|                         | <b><i>Myh6</i></b>   | <i>Wrn</i>     |

A total of 29 genes, including known imprinted genes and non-imprinted genes, were included in the test data set. Nine genes fall within the known imprinted category, while 20 genes fall within the non-imprinted category. Genes in bold were called as imprinted at the stringency levels indicated in the text.

**Table A5. Summary of microimprinted genes and hosts.**

| <b>Microimprinted Gene</b> | <b>Microimprinted Gene Prediction</b> | <b>Host Gene</b>      | <b>Host Gene Status</b> | <b>Host Gene Prediction</b> |
|----------------------------|---------------------------------------|-----------------------|-------------------------|-----------------------------|
| <i>Inpp5f_v2</i>           | Imprinted                             | <i>Inpp5f</i>         | Non-imprinted           | Non-imprinted               |
| <i>Nap15</i>               | Imprinted                             | <i>Herc3</i>          | Non-imprinted           | Non-imprinted               |
| <i>Nnat1</i>               | Imprinted                             | <i>Blcap</i>          | Imprinted               | Non-imprinted               |
| <i>Peg13</i>               | Non-imprinted                         | <i>1810044AZ24Rik</i> | Imprinted               | Non-imprinted               |
| <i>U2af1rs1</i>            | Imprinted                             | <i>Commd1</i>         | Imprinted               | Imprinted                   |

Each of the five known microimprinted genes and their host genes is listed, along with the expression status of each host gene. Also indicated is the expression status predicted by our models for each gene and its host.

Table A6. Primers used for allele-specific expression assays.

| Gene          | RT  | Tissue Tested | MGI SNP ID | RE        | Cross Needed | PCR (bp)  | Expected AKR Bands (bp) | Expected PWK Bands (bp) | Forward (5' - 3')     | Reverse (5' - 3')     |
|---------------|-----|---------------|------------|-----------|--------------|-----------|-------------------------|-------------------------|-----------------------|-----------------------|
| 603005A.189k  | YES | P             | s30523543  | Dal       | AKR/PWD      | 226       | 74/152                  | 226                     | CCGGAATGACGATCAACT    | TTAGTGGGAGGCCCTTT     |
| 9430015G.109k | YES | P             | s33232729  | Alu       | AKR/PWD      | 315       | 152/163                 | 315                     | GCCACTGGGCAAGTTATGGAT | CCATCCAGAGCAACAATT    |
| A830018L.109k | YES | P             | s32537969  | n/a       | AKR/PWD      | 278       | SEQUENCED               | SEQUENCED               | CACTCAGCCGAGTTTGATTA  | TTCTATAAGCCCAAAA      |
| Alppg15       | YES | P             | s33149566  | TspEI     | AKR/PWD      | 396       | 396                     | 396                     | CCATGCTCAAGAGCCAGCT   | CAAAAAGCCCTGGGATAAT   |
| Cc9           | YES | P             | s6214108   | n/a       | AKR/PWD      | 317       | SEQUENCED               | SEQUENCED               | TGCGCACTCTTTCCT       | TTTGAACACTCTCTCTCT    |
| Cc9           | YES | P             | s48048570  | n/a       | AKR/PWD      | 386       | SEQUENCED               | SEQUENCED               | GGACTCGTGGAAGAAGCTGA  | AGCATCCCTCGAAGACCTC   |
| Cfjar         | YES | P             | s13468974  | n/a       | AKR/PWD      | 296       | SEQUENCED               | SEQUENCED               | GTTCCTGTTGCGAGGGCCAT  | TGTAATGACTCTTAATAAGCA |
| Qm1           | YES | P             | s48284033  | n/a       | AKR/PWD      | 291       | SEQUENCED               | SEQUENCED               | GCATCTAGTGGGGTTTTGT   | AAAGCTCAAGGATAGTCGTC  |
| Dlk1(c)       | YES | P             | s50424874  | n/a       | AKR/PWD      | 385       | SEQUENCED               | SEQUENCED               | CACTCGCTCCACTACTGCT   | GTCTCACTGATCCAGCA     |
| Ej265         | NO  | P             | s48607872  | HpyCH4III | AKR/PWD      | 390       | 145/245                 | 70/75/245               | CGCTGTCCGCCAAGAAGCA   | AGGGAAAGGTGGGAACA     |
| Ertpd1        | YES | P             | s49894562  | n/a       | AKR/PWD      | 243       | SEQUENCED               | SEQUENCED               | GGCCCTCTGCTCTTAAGCT   | CGCCCTCCCTCACTAACA    |
| Ertpd1        | YES | P             | s47465876  | n/a       | AKR/PWD      | 220       | SEQUENCED               | SEQUENCED               | ATGTGCTGTGCAAGCTAATG  | TTTTCCTACTCTGGGTGT    |
| Hmgp2         | YES | P             | s36506234  | n/a       | AKR/PWD      | 337       | SEQUENCED               | SEQUENCED               | TGTTGAAAGCTGAGGGGAGC  | CCAACTATGGGCAAGAAA    |
| Hs6s1         | YES | P             | s31399915  | n/a       | AKR/PWD      | 351       | SEQUENCED               | SEQUENCED               | ATGGGGCACTCCATTTCT    | AGCAAGGGGCAAGGATGTG   |
| Ixx           | YES | P             | s13479838  | RsaI      | AKR/PWD      | 372       | 47/325                  | 47/94/231               | ATGAACAACAATCAGGAAAG  | TCACTCAACTGGGCAAGAT   |
| Irsn1         | YES | P             | s33601143  | BclII     | AKR/PWD      | 393       | 393                     | 75/318                  | CTGAGAAGGGAAAAGCA     | GTGGAAATGTTGCAAGCA    |
| Kcrj15        | YES | P             | s47548183  | PleI      | AKR/PWD      | 228       | 228                     | 40/188                  | AGACAGCTCTTCTAGTGGCA  | TGACGGTGGCTCGCTCAT    |
| Kdr           | YES | P             | s33600889  | n/a       | AKR/PWD      | 365       | SEQUENCED               | SEQUENCED               | TGTGTGGAGAATGGGTGAGA  | AGCAAGCTGCTACTTTCT    |
| Lopm4b        | YES | P             | s13460434  | BclI      | AKR/PWD      | 303       | 35/182                  | 86/217                  | TCACACTTCTTCTCTGG     | TGCAACAACCTAATGCAAG   |
| Nefm          | YES | P             | s31130948  | Alu       | AKR/PWD      | 616       | 81/82/127/134/192       | 81/82/86/107/127/134    | AGTGGTGTCTCAACAAGAGG  | TGTGCAATAGCAAGCTTC    |
| Nlgn1         | YES | P             | s33775315  | BclII     | AKR/PWD      | 616       | 616                     | 173/443                 | CACTCGGAGGGTGTCTCTT   | TCCTGAAAAGGGTGTGG     |
| Rcd21         | YES | P             | s51706694  | n/a       | AKR/PWD      | 320       | SEQUENCED               | SEQUENCED               | ATGAAGAAGTTGGGGAACGC  | AAATCCCTCTCTGGCAGA    |
| Pag1(c)       | YES | P             | s45778758  | HinfI     | AKR/PWD      | 429       | 11/22/24/43/75/109/188  | 11/22/26/75/94/211      | GGATGCACTGATGGGAACT   | CTGGCAAGCTCAAGTAAT    |
| Pim2          | NO  | P             | s51284236  | SspEI     | AKR/PWD      | 228       | 32/151/146              | 32/151/146              | AGAGCTGCAAGGCACTGAGA  | CTAGCTCTCCTCACTGACG   |
| Sb4           | YES | P             | s27300226  | n/a       | AKR/PWD      | 399       | SEQUENCED               | SEQUENCED               | GCACTGGAATCTCCTGCTC   | TGCAAGAATGCGATGCT     |
| Tirag1        | NO  | P             | s27517674  | HpaII     | AKR/PWD      | 357       | 134/263                 | 88/134/175              | AGTACGGCAAGCTGGGACT   | AGCTGTGCTCATCTTGTCT   |
| Tmem159       | YES | P             | s36357460  | SylI      | AKR/PWD      | 318       | 151/167                 | 318                     | AGGAAAGGGGCAAGGGGATTA | CTGACTCTGGGCACTAGC    |
| Tppp3         | NO  | P             | s31410905  | NdeI      | AKR/PWD      | 342       | 75/267                  | 342                     | CGTGTGCAACAATAAGCC    | AATAGGCGAAGAAGAAC     |
| Ulx2d         | YES | P             | s13464870  | RsaI      | AKR/PWD      | 241       | 17/124                  | 17/105/119              | CTGAGTCCAGCTCAAGCTC   | GCCAGCTCAATGTGTACT    |
| A53008H.089k  | NO  | B/P           | s26891226  | n/a       | AKR/PWD      | 329       | SEQUENCED               | SEQUENCED               | GATTCGCAAGCACTGAGT    | TGGCTGTGTAGAGATCTC    |
| Ankx55        | NO  | B/P           | s47406379  | DdeI      | AKR/PWD      | 589       | 21/39/250/279           | 21/39/121/158/250       | CGAGAAAAGCCCAAGAAG    | GTTTGGGGAGAGGAGCTGAA  |
| Ars           | NO  | B/P           | s31839713  | n/a       | AKR/PWD      | 374       | SEQUENCED               | SEQUENCED               | AGGCACTTAAGCTGGCTCA   | GCATCGAATCTTAGTCCG    |
| Cdk108        | NO  | B/P           | s49059569  | Hpy188III | AKR/PWD      | 455       | 104/351                 | 455                     | ACCAAGCAGAACTGCTGATG  | GGCAACGAGCTCTCTATT    |
| Gdh13         | NO  | B/P           | s37221381  | TspEI     | AKR/PWD      | 416       | 9/407                   | 9/112/295               | GTGCTCTGCTCACTGCTCG   | GGCTCTCTGTGCTCTGG     |
| Gdh15         | NO  | B/P           | s36272769  | FnuHI     | AKR/PWD      | 294       | 5/289                   | 5/83/206                | CCGAAAATGCTCTCCATC    | GGGCTGATGTTGCTCTCT    |
| Onch          | NO  | B/P           | s29898988  | TaqI      | AKR/PWD      | 307       | 307                     | 103/207                 | AACAAGTGGGACTGCAAG    | TGTTGAGCTGATTTGGCTA   |
| Orb3          | NO  | B/P           | s13478935  | PciI      | AKR/PWD      | 365       | 365                     | 163/204                 | GGATGAGAAAGCACTGTCTG  | TTCAACTCAAGATTGAAAC   |
| Ddb           | NO  | B/P           | s29357341  | PmlI      | AKR/PWD      | 332       | 199/133                 | 332                     | CGTGTGATCAACAAGCTGG   | AAAGCTGGCAACAAGATAC   |
| Dennd1a       | NO  | B/P           | s27167794  | n/a       | AKR/PWD      | 793       | SEQUENCED               | SEQUENCED               | ACTTCTGGGCTGTGCTGAT   | CCCTTTTGATGAGCTCGA    |
| Dnt1a         | YES | B/P           | s48196064  | Cac8I     | AKR/PWD      | 303       | 119/184                 | 31/119/153              | AAATAATGGCCCTCCCTGT   | CGTAGGGCAAGGAACTTAA   |
| Dusp27        | NO  | B/P           | s31389162  | BclII     | AKR/PWD      | 488       | 488                     | 167/291                 | AAAGGAAAAGTACTCTCATGG | TGCACTCTGGGAGATGTA    |
| Erp3          | NO  | B/P           | s32627243  | Hpy99I    | AKR/PWD      | 367       | 367                     | 170/197                 | CGGAAAATGTCCTCAATTTTG | GTGGCACTGATGCTCCATT   |
| Epi4          | NO  | B/P           | s13476721  | n/a       | AKR/PWD      | 598       | SEQUENCED               | SEQUENCED               | AGGCTGTGCAAGGCACTGAGA | ATGATTTTGGGCTGAGCTTC  |
| Fbxo40        | NO  | B/P           | s46567644  | Bsal      | AKR/PWD      | 413       | 1/49/149/203            | 1/149/263               | TGAGGCTCTCAAGCACTGAGA | CCCTGGAAGAAAGCAAGAA   |
| Gao1          | YES | P             | s32088898  | DdeI      | AKR/PWD      | 555       | 57/197/301              | 197/368                 | CTTCTCTGGGCAAGCAAT    | TTCTAAGGCTGCTGCAAT    |
| Hjup          | NO  | B/P           | s47422786  | BsmAI     | AKR/PWD      | 359       | 359                     | 195/204                 | CAGTAAGCCAGTGAAGCTCA  | GCTGCTAGGATACAGAG     |
| Hjup          | NO  | B/P           | s47422786  | BsmAI     | AKR/PWD      | 431       | 119/312                 | 119/155/157             | CAGTAAGCCAGTGAAGCTCA  | AGGCTCAAGATACAGAG     |
| Hlcs          | NO  | B/P           | s46075810  | BsaHI     | AKR/PWD      | 783       | 310/473                 | 159/310/314             | TCCGTAAGCAATCTCTCTG   | ACAGGCTCAAGTCAAGCA    |
| Kcr2          | NO  | B/P           | s27665342  | HinfI     | AKR/PWD      | 663       | 15/20/118/178/261       | 15/20/118/178/439       | TCGGAAGCTGTGAGGAATCT  | GGGCTCTTATGGTATTG     |
| Mltif         | YES | B/P           | s36918569  | TaqI      | AKR/PWD      | 326       | 148/178                 | 326                     | TTGAAGCTCTCCAGCTCA    | AGGCACTCCACTTCTCAT    |
| Mage2(c)      | YES | B/P           | s33055130  | n/a       | AKR/PWD      | 330       | SEQUENCED               | SEQUENCED               | GGGCAATTTGCTCTCTGCTG  | TTTTCCAGACAATAATTCCG  |
| Mam13         | NO  | B/P           | s46281300  | Hpy99I    | AKR/PWD      | 269       | 269                     | 84/185                  | CGCAAGTCAACAATTTCTC   | CTGATTTGGAATGCTGCA    |
| Meltp1        | NO  | B/P           | s28296173  | n/a       | AKR/PWD      | 363       | SEQUENCED               | SEQUENCED               | CTGCTGGGAGGAGGTGTG    | CCATGGAACAAGGGCATCA   |
| Mst1r         | YES | B/P           | s33282822  | BclII     | AKR/PWD      | 362       | 7/21/42/42/68/182       | 7/21/68/84/182          | AGGAGGGTGAATGTCGCACT  | GGGGCAACAAGCTCTGCA    |
| Nefm          | YES | B/P           | s30748232  | BclII     | AKR/PWD      | 480       | 221/259                 | 480                     | AAAATCCCTAAGCCAACTG   | AGTCGAAGCTTCTCTCT     |
| Oxsm          | NO  | B/P           | s13482075  | EagI      | AKR/PWD      | 492       | 219/273                 | 492                     | GGTGTAGCGCTGCACTT     | CAGCCATCTCTTCTCCCTA   |
| Pava          | NO  | B/P           | s32383767  | AclI      | AKR/PWD      | 468       | 468                     | 222/246                 | AGCAAGGGGATCTCTCACT   | CCAGGGCTCACTCCCACT    |
| Pgl           | NO  | B/P           | s26924932  | TspEI     | AKR/PWD      | 244       | 99/145                  | 244                     | AGGAGGGGAAAGCTGCTAAA  | CCGAGTGAGGTTGATCTCA   |
| Qpcr1         | YES | B/P           | s52225296  | n/a       | AKR/PWD      | 320       | SEQUENCED               | SEQUENCED               | TGATGCTCCACTAATTTTCTC | CATGAAAATAATTCACAATA  |
| Rxrg1(c)      | NO  | B/P           | s29947965  | HinfI     | AKR/PWD      | 355       | 99/134/162              | 99/296                  | GGCTCAAGTAGAATGCTCT   | TACAGAAAGCTGGTGTGTG   |
| Scin          | NO  | B/P           | s49691441  | Alu       | AKR/PWD      | 485       | 124/361                 | 106/124/255             | TGAAATTTGATCAAGGCTAAC | TGATGCTCAAGAAAGCTCA   |
| Sf1           | NO  | B/P           | s26899985  | BaeIII    | AKR/PWD      | 430       | 169/262                 | 430                     | GTTCCTGCTGTTGTTGCTGT  | GAAGTCCCAAGATGTGATCA  |
| Sic1a1        | NO  | B/P           | s51755774  | PleI      | AKR/PWD      | 471       | 67/426                  | 67/149/257              | TGACAATGATGAGGGGATTT  | TGTTTGAAGCCCAAGCAAG   |
| Sic3b1        | NO  | B/P           | s49654319  | MspAII    | AKR/PWD      | 416       | 416                     | 192/224                 | ATGAAGAAGCTGGGAGCA    | AAAGTGTACTACTTCTGTCTC |
| Sy9           | NO  | B/P           | s49223695  | Hpy188III | AKR/PWD      | 624       | 16/301/307              | 16/66/241/301           | CACAGAAGCAAGGCAAGG    | GGCTTGGAAAGATGAGAG    |
| Tim25         | YES | B/P           | s27099824  | n/a       | AKR/PWD      | 293       | SEQUENCED               | SEQUENCED               | ATCATTTGTAAGGGGCAAGG  | AGCAGGCTACTCCATCA     |
| Tpx2          | NO  | B/P           | s31840788  | FnuHI     | AKR/PWD      | 246       | 159/57                  | 246                     | AGAGAAGTGCAAGCCCAAG   | TGCTGGGGAAGATGCTCAT   |
| Vil2          | NO  | B/P           | s13474581  | SexAI     | AKR/PWD      | 415       | 415                     | 315/100                 | GAGCTGTGGTGTGCTGATGA  | GGGGAAGGAGGAGTTGCTA   |
| Wt1           | YES | B/P           | s27444810  | n/a       | AKR/PWD      | 336       | SEQUENCED               | SEQUENCED               | TGAAATTCTCCACTCACTCA  | ACACATGCTGCTGATATAA   |
| Wt1           | YES | B/P           | s27444811  | n/a       | AKR/PWD      | 336       | SEQUENCED               | SEQUENCED               | TGAAATTCTCCACTCACTCA  | ACACATGCTGCTGATATAA   |
| Zfp629        | YES | B/P           | s33162562  | HaeIII    | AKR/PWD      | 697       | 132/270/295             | 270/427                 | GGCAAGAGCTTTGCAAGTGT  | TGGCACTAGTGTGAAGGTC   |
| Zfp810        | NO  | B/P           | s48701411  | MspAII    | AKR/PWD      | 339       | 159/180                 | 339                     | TCTATCCCTGGAAGCTGGA   | CCAGGCTGCTGTAAGTCTC   |
| Adrm18        | NO  | B             | s36490947  | SspI      | AKR/PWD      | 594       | SEQUENCED               | SEQUENCED               | TGGTGTGCAATACTGCA     | TGGGGAAATTTTTTGTCAT   |
| Bcm1          | NO  | B             | s45757813  | NciI      | AKR/PWD      | 561       | 185/188/188             | 188/373                 | CAGGAAGAAGGAGGGCTTTG  | CCGGTAATCAACTTCTCA    |
| Cyto2         | NO  | B             | s50671503  | n/a       | AKR/PWD      | 492       | SEQUENCED               | SEQUENCED               | GGACTCTTGGAAAGGACTGC  | ACTGTGCAAGCTGTGTGAT   |
| Hjup          | YES | B             | s30298180  | n/a       | AKR/PWD      | 336       | SEQUENCED               | SEQUENCED               | CCAATGGTCAAGAACTGGA   | CACTTTGGCCCTCAAGT     |
| Hoxc4         | NO  | B             | s32322072  | MspI      | AKR/PWD      | 594       | 251                     | 38/213                  | GTTAGCGGGAGGCAACTCT   | GGAAGGGGCTTTGTTTAA    |
| Mhp17         | YES | B             | s37484938  | n/a       | AKR/PWD      | 520       | SEQUENCED               | SEQUENCED               | CTCTCTGCTCTGCACTTCA   | CCTGAAATGATCTCTCA     |
| Mst2          | YES | B             | s37484938  | HaeIII    | AKR/PWD      | 371       | 520                     | 410/110                 | CTTTGGAAGCAGCTGGGAG   | GGGAGGAAGTGGCTGCTG    |
| Neuro2        | YES | B             | s27071146  | Cac8I     | AKR/PWD      | 336       | SEQUENCED               | SEQUENCED               | AAACCAAGTGTGGCAATG    | AGCTCAAGGATTTTTCAT    |
| Rps4          | NO  | B             | s30733724  | BsmAI     | AKR/PWD      | 553       | 63/475                  | 63/115/360              | GCCGCACTGATCAAGCTAT   | CTGGAGATAAGGACTGAAG   |
| Th1a1         | YES | B             | s36665692  | n/a       | AKR/PWD      | 326       | SEQUENCED               | SEQUENCED               | AGAAAGTCCAAGGCACT     | ATAAATCCCTGCAAGTGTG   |
| Th            | NO  | B             | s33824309  | Hpy99I    | AKR/PWD      | 634       | 132/502                 | 132/159/343             | TGAAAGCAATCAACTCACT   | GGCATGCGATGATGCTG     |
| Tmed4         | NO  | B             | s26899778  | AclI      | AKR/PWD      | 369       | 369                     | 181/188                 | GGTTCCTCAAGAAAGGAGC   | CTGTCGCTGGTGGTTTTG    |
| 9530015078k   | NO  | n/a           | s50181318  | HpyCH4III | AKR/PWD      | 435       | 196/249                 | 435                     | GGAAAATTTGGCAAGCAAGA  | GTGTCGCTCTGCTGCTC     |
| A1040206      | YES | n/a           | s37897697  | NsiI      | AKR/PWD      | 408       | 147/261                 | 408                     | TGAAAGCAAGCAACTGCTGA  | TCCTGCTGCAAGCACTGT    |
| A1040206      | YES | n/a           | s49964787  | BclII     | AKR/PWD      | 521       | 132/389                 | 521                     | GCAACAATAACTGCTGCA    | AAAGTGAAGAAGGGGAGGCT  |
| Rxrd2         | YES | n/a           | s31959150  | AKR/PWD   | 326          | SEQUENCED | SEQUENCED               | CAGGAAAAGTTGGGAAGCA     | GACTGGGGCTGAGGAGGAT   |                       |
| RyR6          | NO  | n/a           | s27426565  | MspAII    | AKR/PWD      | 419       | 178/241                 | 419                     | CAAGCAAGGCTGCTGACT    | AGGTTCTCTCACTGCTGAT   |
| Ugt1a1        | YES | n/a           | s3036269   | BclII     | AKR/PWD      | 411       | 411                     | 180/231                 | TGAAAAGTCAAAAAGGGATTC | GGCTCAAGGATTCGGA      |

\* n/a in "Tissue Tested" column= either primer pairs that did not amplify or genes that, upon experimental testing, did not actually contain a SNP between the two mouse strains used. (c) = known imprinted genes used as expression controls.

## Figure Legends

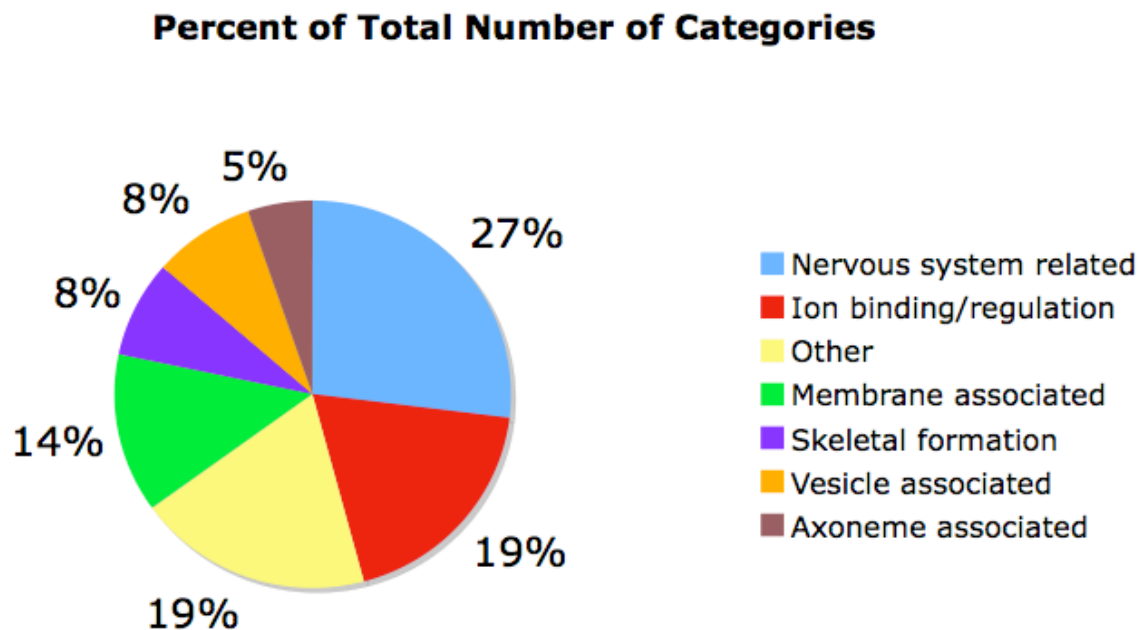

**Figure A1. Gene ontology categories overrepresented in both known imprinted genes and predicted imprinted genes.** To identify any trends in function among imprinted genes, known imprinted genes included in the training array, as well as our initial list of 155 candidate imprinted genes, were analyzed with GOEAST ([http://omicslab.genetics.ac.cn/GOEAST/php/batch\\_genes.php](http://omicslab.genetics.ac.cn/GOEAST/php/batch_genes.php)), which identified gene ontology (GO) classes that are statistically overrepresented in imprinted genes. 209 GO classes are overrepresented in known imprinted genes ( $p < 0.05$ ) and 103 GO classes are overrepresented in the candidate imprinted genes ( $p < 0.05$ ). 37 categories that are overrepresented in the candidates gene set are similar to categories overrepresented in the known imprinted gene set. Within the 37 similar GO categories, several trends appear: 27.0% of the 37 similar GO categories are



nervous system related, 18.9% are implicated in ion binding/regulation, and 13.5% are membrane related.

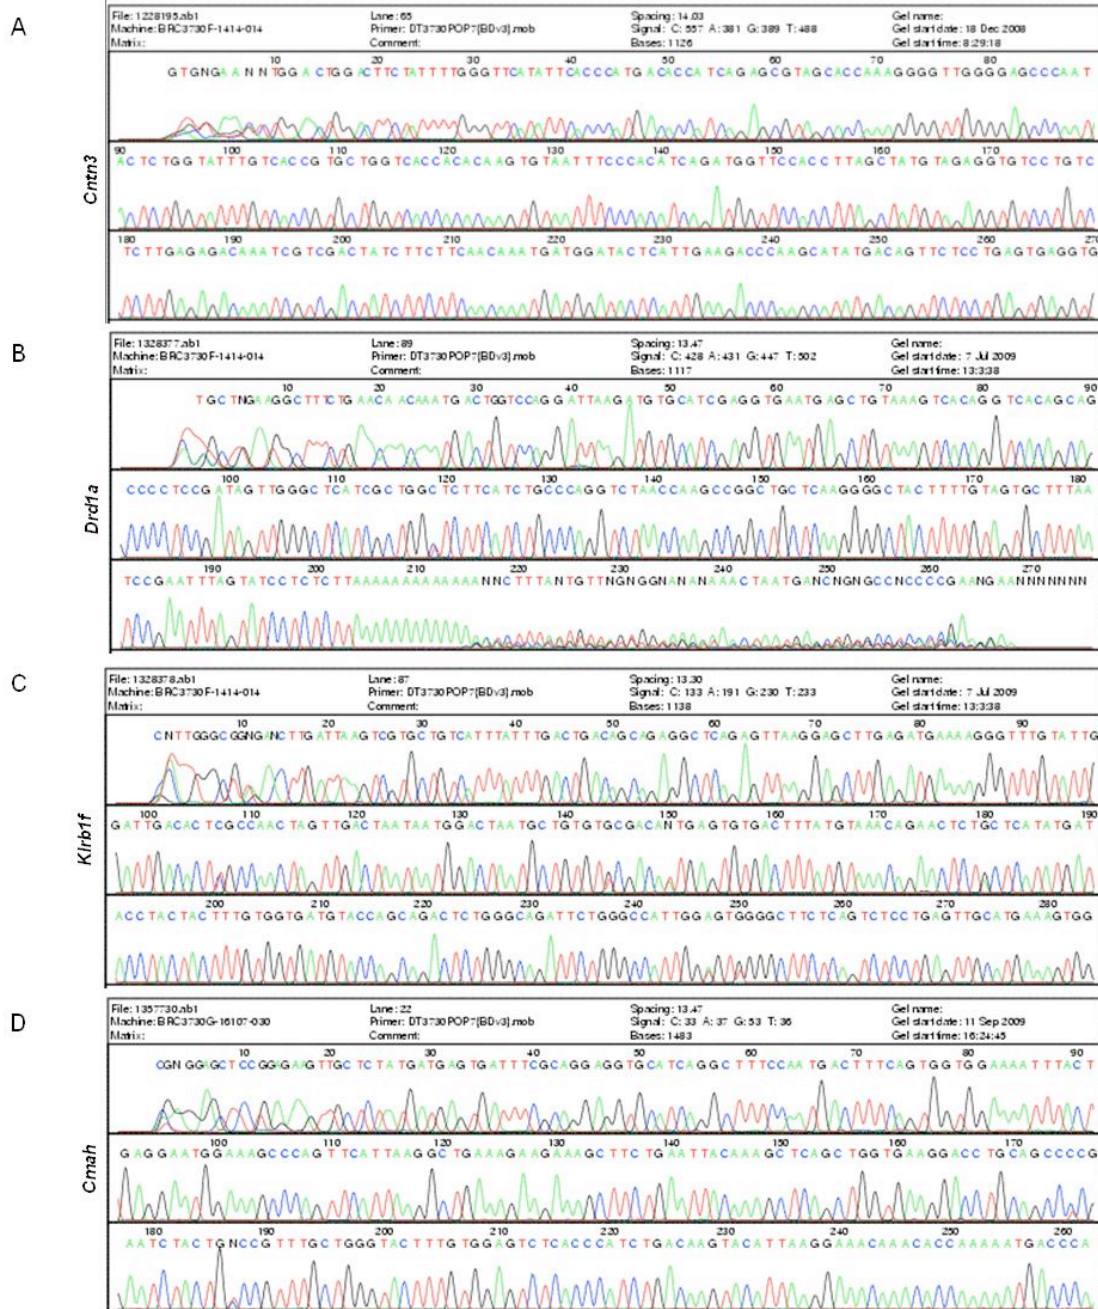

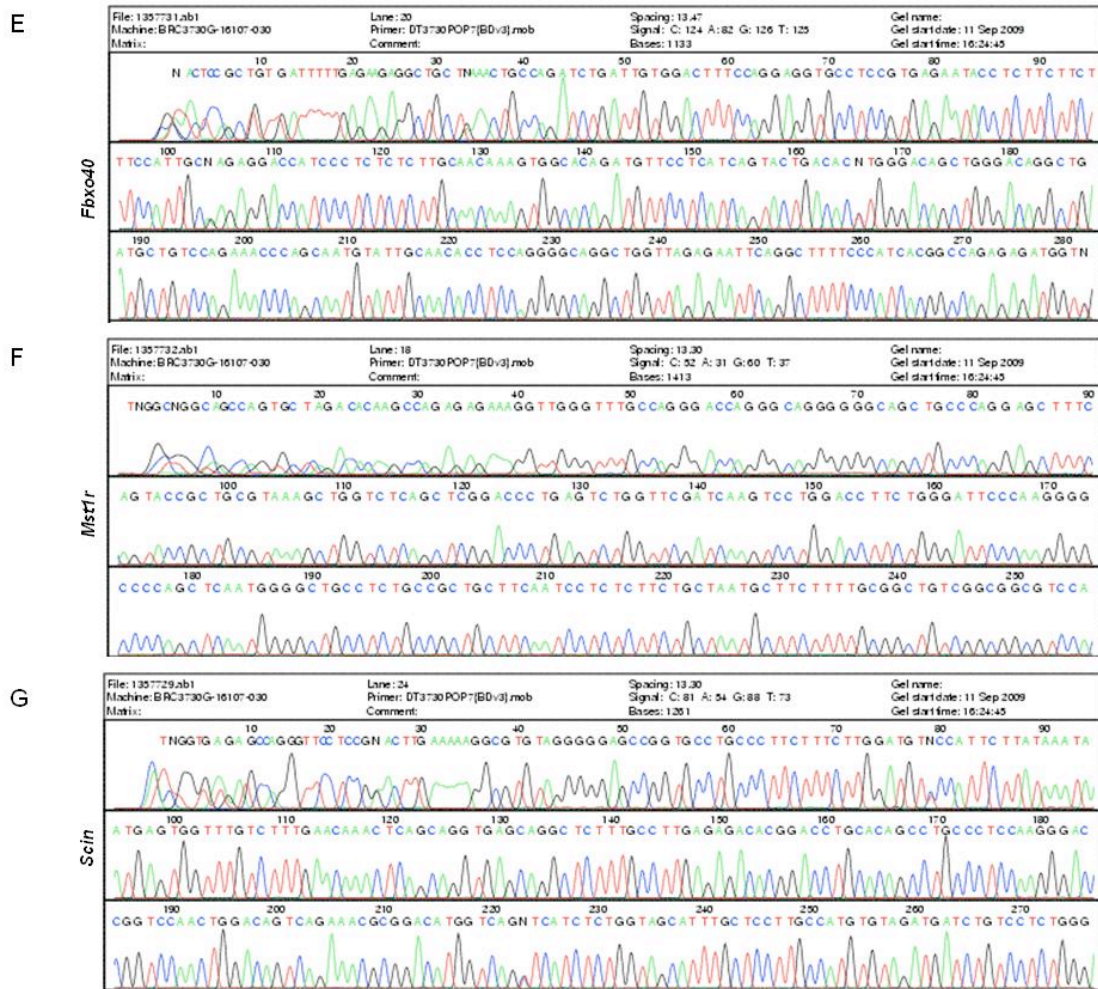

**Figure A2. Sequence trace files of *Cntn3*, *Drd1a*, *Klrb1f*, *Cmah*, *Fbxo40*, *Mst1r*, and *Scin* PCR products.** Sequence trace files of gel-purified PCR products from primers amplifying *Cntn3* (panel A), *Drd1a* (panel B), *Klrb1f* (panel C) *Cmah* (panel D), *Fbxo40* (panel E), *Mst1r* (panel F), and *Scin* (panel G). Sequencing results confirm that the expected products were amplified and that products are specific to the genes indicated.

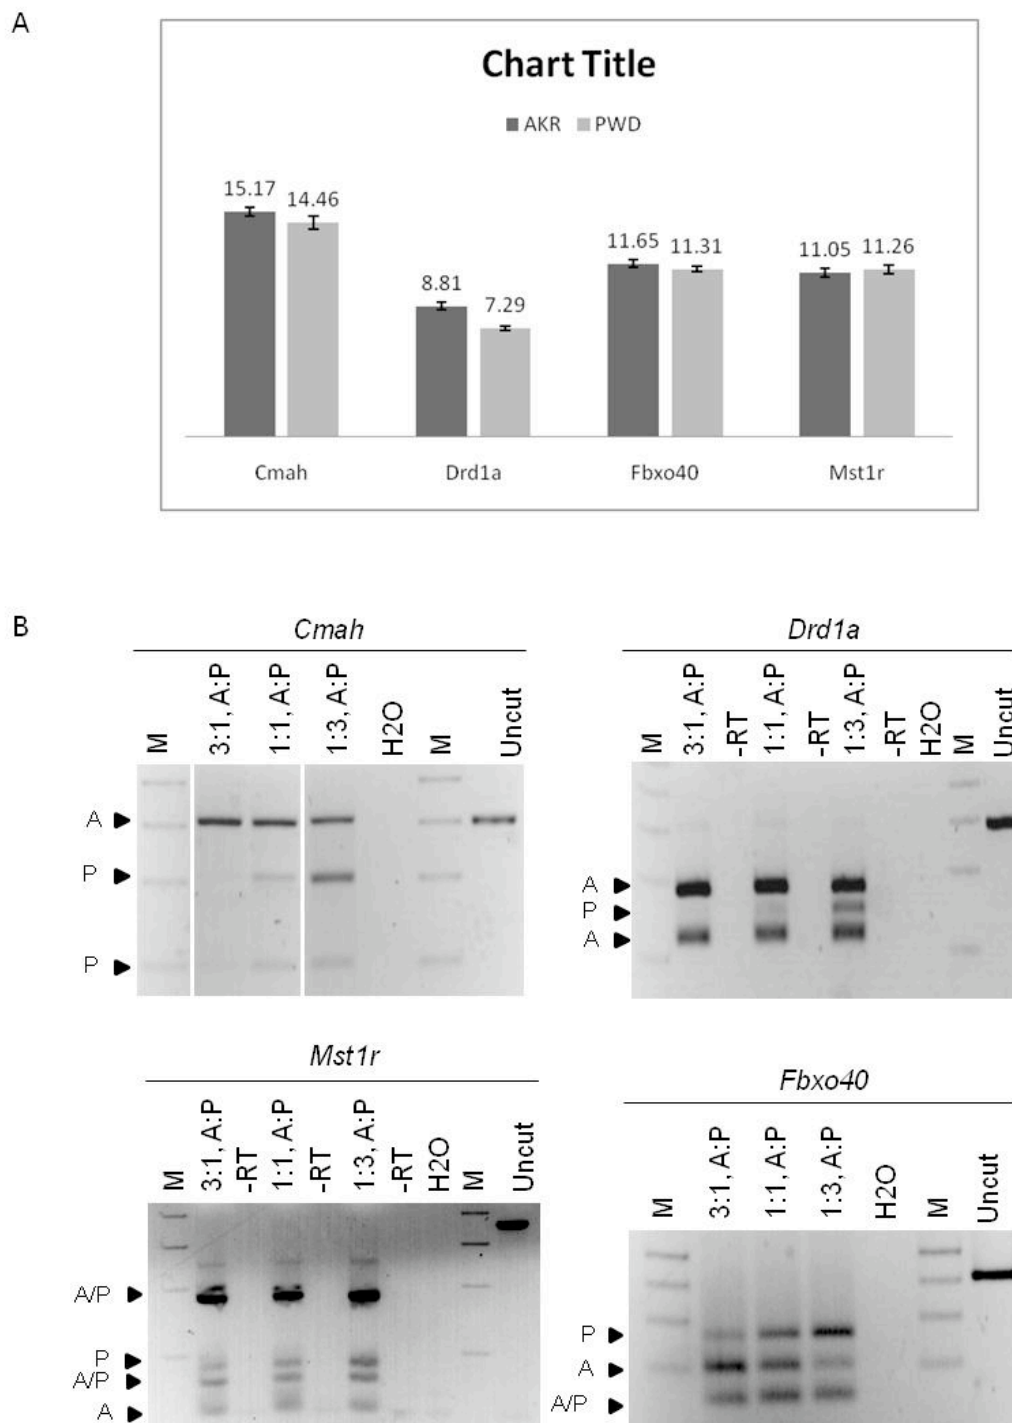

**Figure A3. Expression and amplification bias of *Cmah*, *Drd1a*, *Fbxo40* and *Mst1r*.** In panel A, cDNA prepared from the AKR and PWD pure inbred strains was subjected to quantitative real-time PCR (qRT). Amplification for each gene was done in triplicate, and results were normalized to *Rpl32* and *Tuba2* internal

controls. Normalized Ct values for AKR (dark grey bars) and PWD (light grey bars) are shown for each of the four genes analyzed. A lower Ct value indicates higher levels of expression. The expression in the AKR and PWD strain backgrounds is roughly equal for *Cmah*, *Fbxo40*, and *Mst1r*. The expression of *Drd1a* is higher in the PWD strain background. Error bars show standard error. In panel B, the same cDNAs were mixed in 3:1 (AKR:PWD), 1:1 (AKR:PWD), and 1:3 (AKR:PWD) ratios and PCR amplified with the same primer pairs used for the imprinting analysis. After PCR amplification, PCR products were digested with the same restriction enzyme used for imprinting analysis. *Cmah* and *Drd1a* show an amplification bias for the AKR allele, while *Fbxo40* and *Mst1r* show no amplification bias. M = 1kb+ DNA marker. A:P = AKR:PWD. A = AKR. P = PWD.

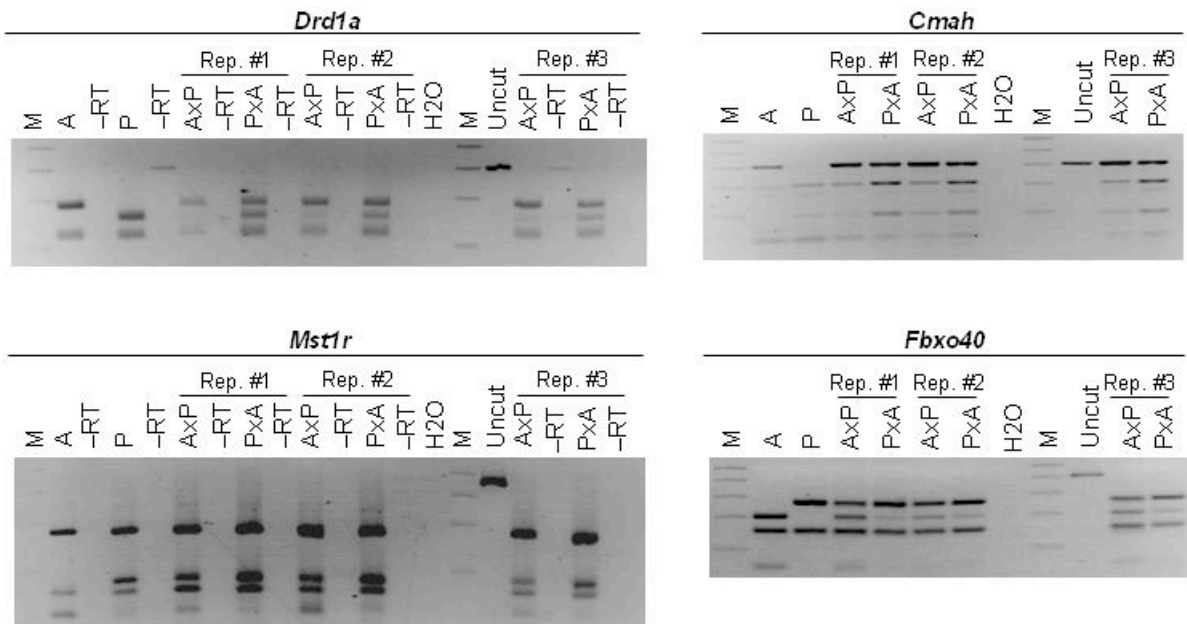

**Figure A4. Additional biological replicate confirms maternal expression of *Drd1a*, *Cmah*, *Mst1r*, and *Fbxo40*.** We PCR amplified placental cDNA from e17.5 embryos prepared using reciprocal crosses between AKR/J (A) and PWD/PhJ (P) mice, as well as from the parental strains. In the figure labels, the maternal strain is written first. PCR primers were specific *Drd1a*, *Cmah*, *Mst1r*, and *Fbxo40*. PCR products were digested overnight with restriction enzymes specific for one parental allele and run on 3% agarose gels. All 4 genes reproducibly show expression patterns consistent with maternal allele expression, as seen in Figure 2. The addition of a third biological replicate for each gene, shown on the far right-hand side of each gel under the heading Rep. #3, further confirms the results seen in Figure 2. M = 1kb+ DNA marker. A = AKR. P = PWD. Rep. # = biological replicate number.

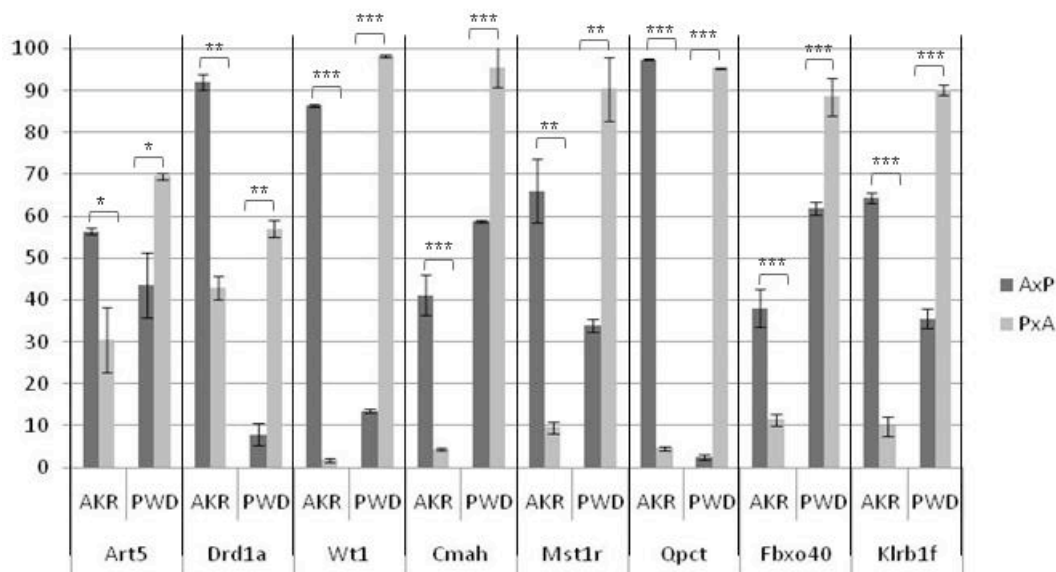

**Figure A5. Quantitation of AKR and PWD allele-specific expression.** The expression level of the AKR and PWD alleles was determined as previously described using Sanger sequencing and the Peak Picker2 software (10 and 35). Briefly, F1 genomic DNA and two to three cDNA biological replicates from both the AKRxPWD and the PWDxAKR crosses were amplified by standard PCR using the primers in Table A6. PCR products were gel-purified (Qiaex Quick Spin, Qiagen) then Sanger sequenced. The sequence trace files were analyzed using the PeakPicker2 software. For each gene, the expression level for each allele is reported as a percentage out of 100. Error bars represent standard error. Each gene was queried by at least one SNP and, whenever possible, data from multiple SNPs were used. For *Wt*, *Cmah*, and *Fbxo40*, two SNPs were available. Three and six SNPs were available for *Qpct* and *Klrb1f*, respectively. Data reported represent combined results from all available SNPs. Differences in allelic expression levels between the two reciprocal crosses were significant in every case, as determined by a one-tailed T-test.

AxP = AKR mother crossed to PWD father. PxA = PWD mother crossed to AKR father. \* = p-value < 0.05. \*\* = p-value < 0.005. \*\*\* = p-value < 0.001.
